# Supplementary material for: Loss of Lipid Carrier ApoE Exacerbates Brain Glial and Inflammatory Responses after Lysosomal GBA1 Inhibition
Source: MDPI journal article supplement (doi:10.3390/cells12212564), 2023-11-02
Supplement: s1 [file s1]

# Cerebral cortex

WT

ApoE-KO

Vehicle

GBA1(-)

Vehicle

GBA1(-)

250 —  
150 —  
100 —  
75 —  
55 —  
37 —  
25 —  
20 —  
15 —  
10 —

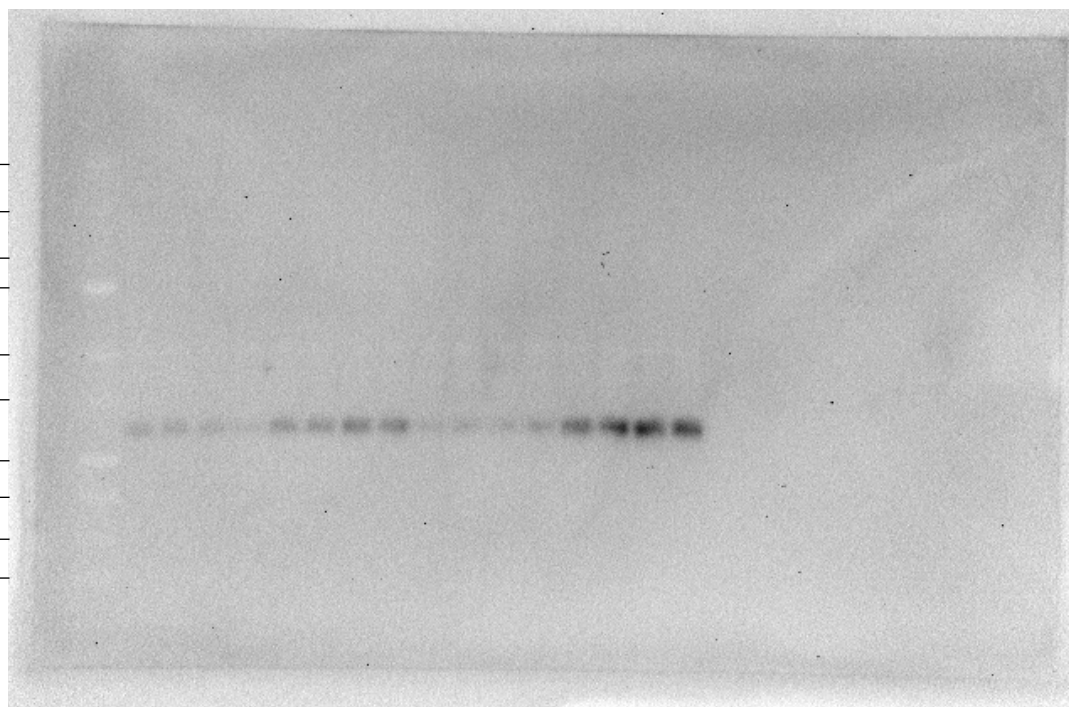

C1q

250 —  
150 —  
100 —  
75 —  
55 —  
37 —  
25 —  
20 —  
15 —  
10 —

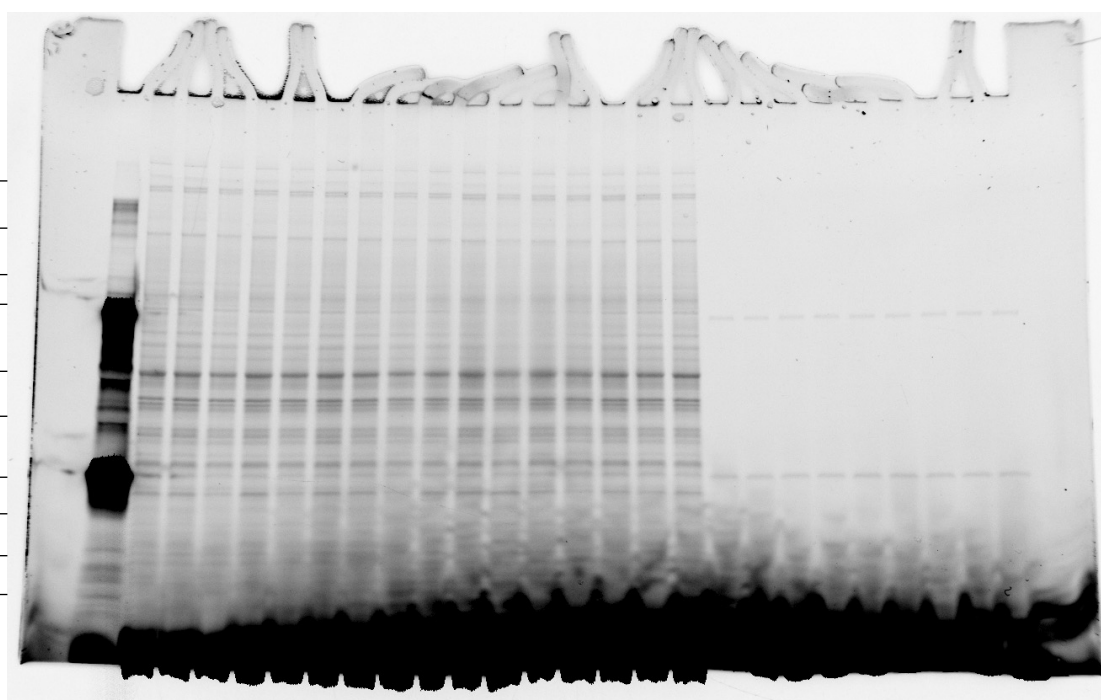

Total  
protein

**Figure S1. GBA1 inhibition increased C1q levels in the cerebral cortex and was amplified by loss of ApoE.** Uncropped images of the C1q Western blot and total protein loading used to create the representative gel image in figure 3B.

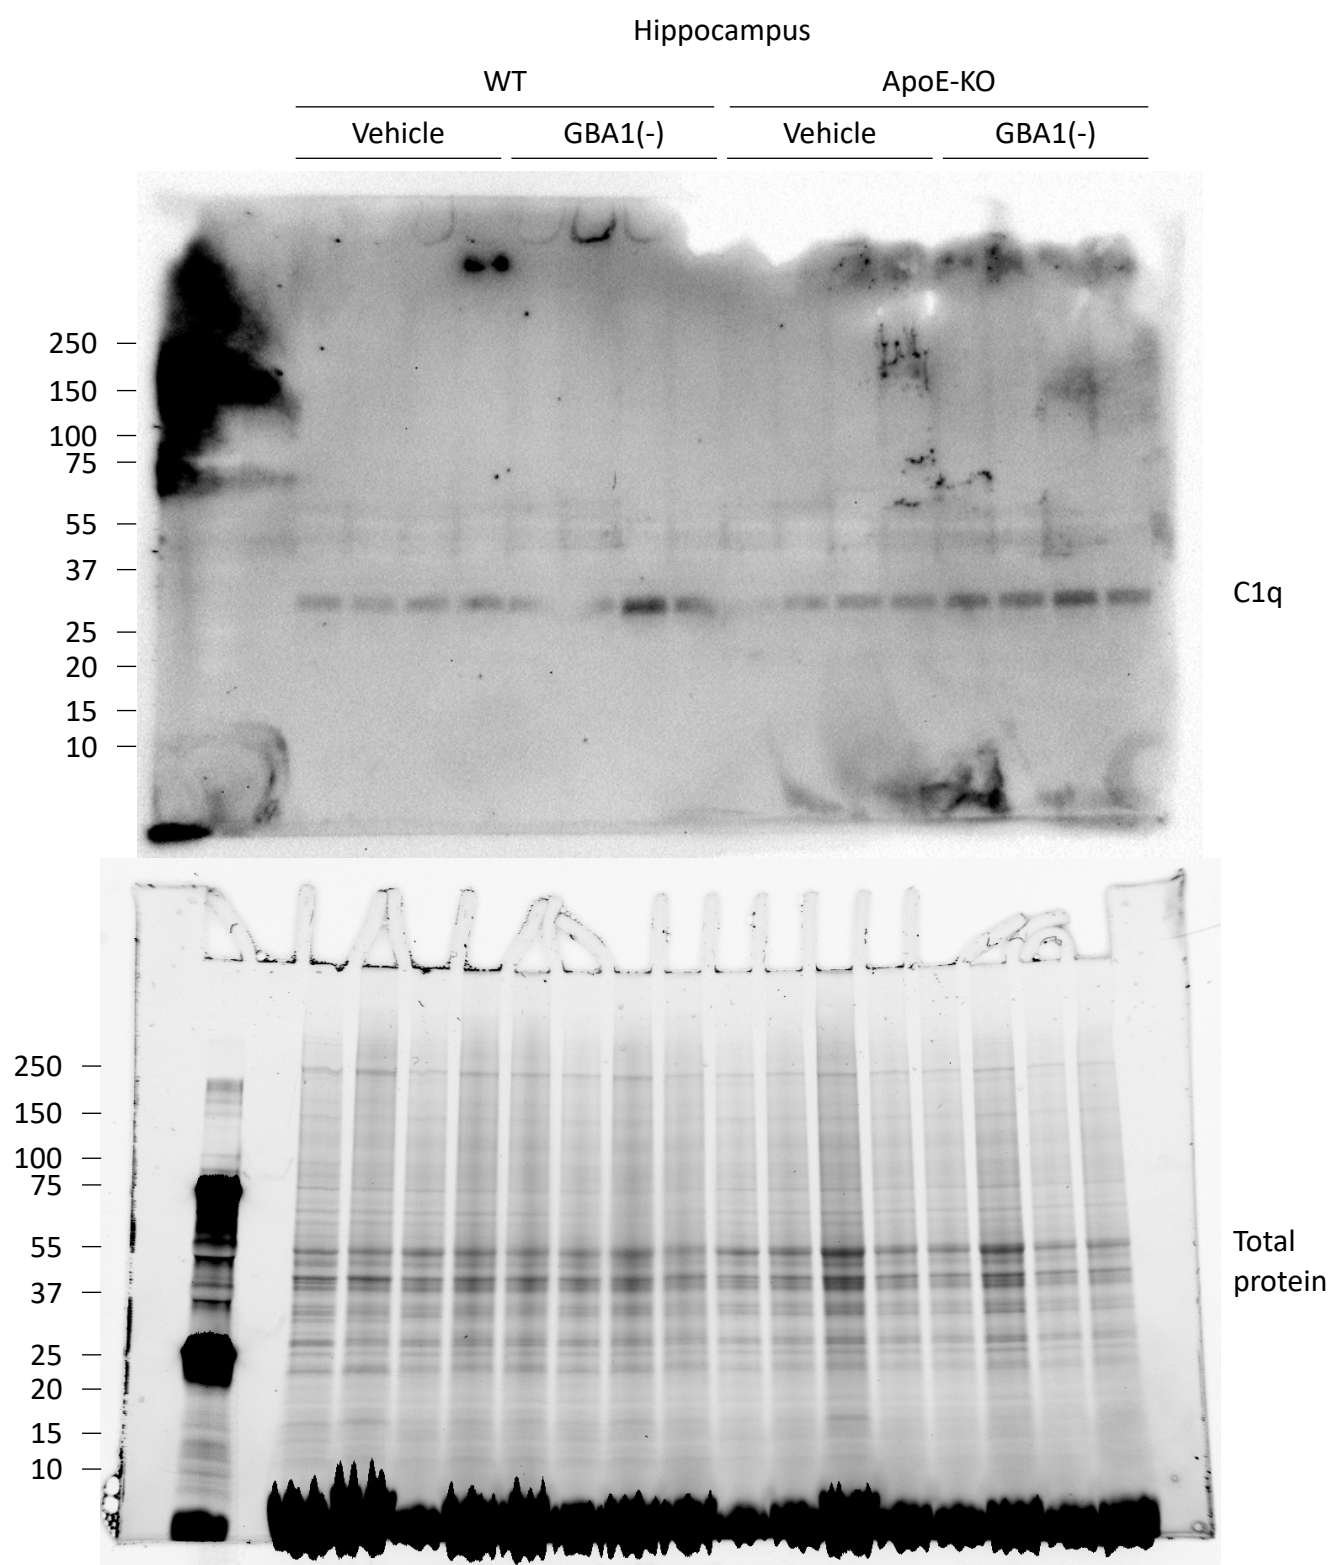

**Figure S2. GBA1 inhibition increased C1q levels in the hippocampus and was amplified by loss of ApoE.** Uncropped images of the C1q Western blot and total protein loading used to create the representative gel image in figure 3D.

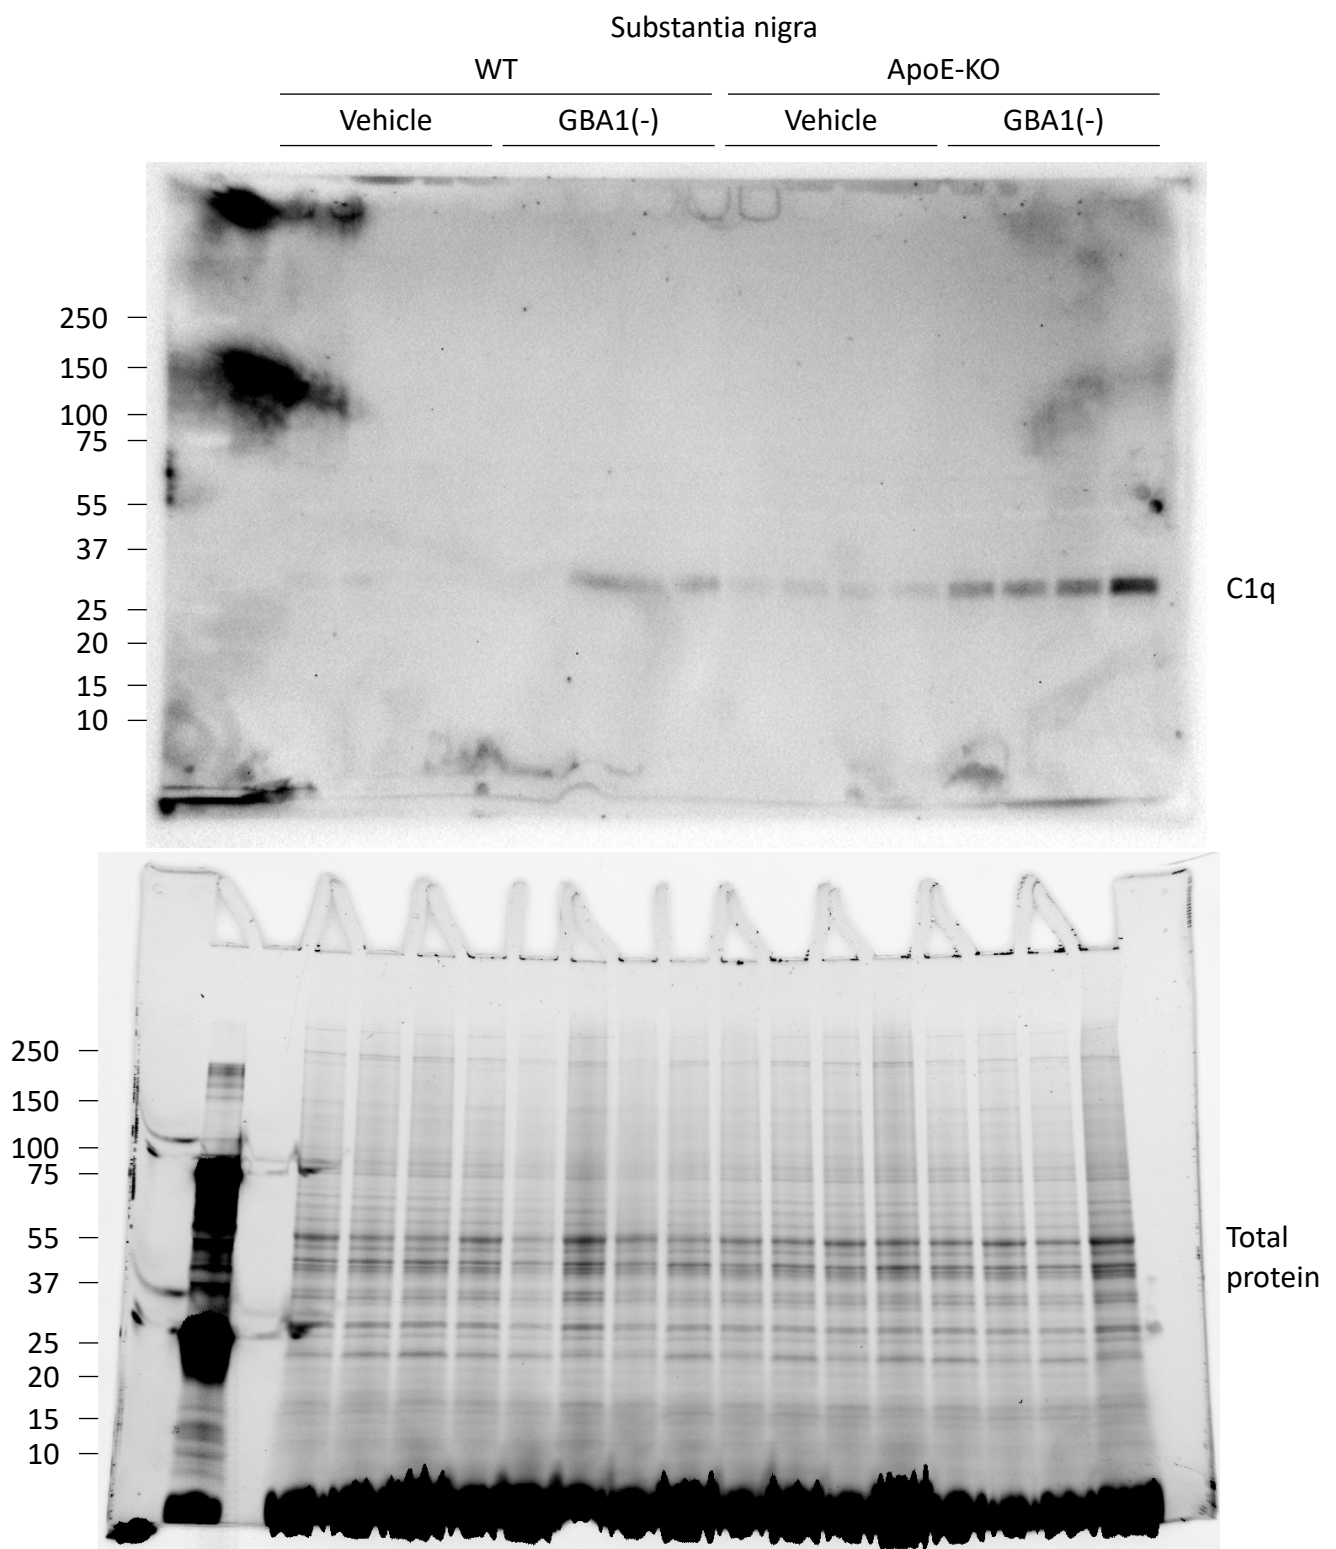

**Figure S3. GBA1 inhibition increased C1q levels in the substantia nigra and was amplified by loss of ApoE.** Uncropped images of the C1q Western blot and total protein loading used to create the representative gel image in figure 3F.

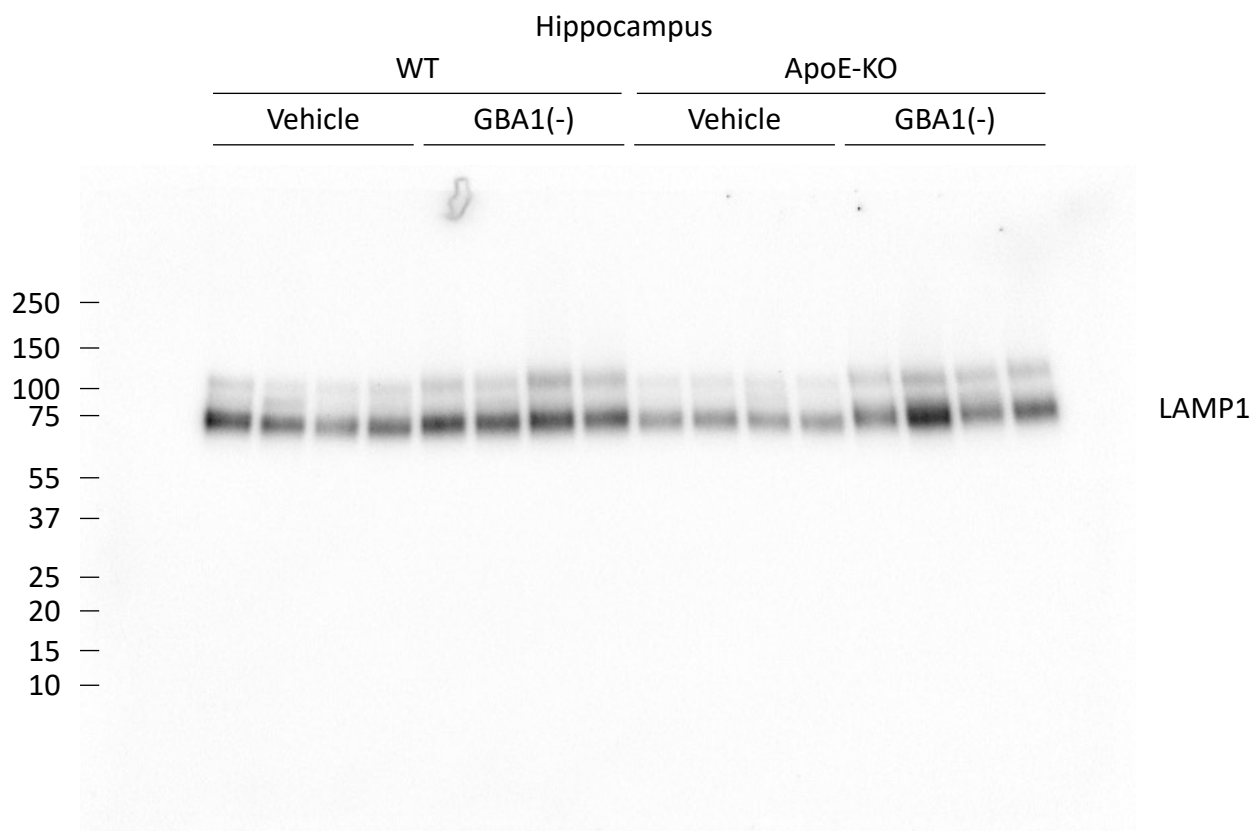

**Figure S4. LAMP1 protein levels were increased after GBA1 inhibition.** Uncropped image of the LAMP1 Western blot used to create the representative gel image in figure 5A.

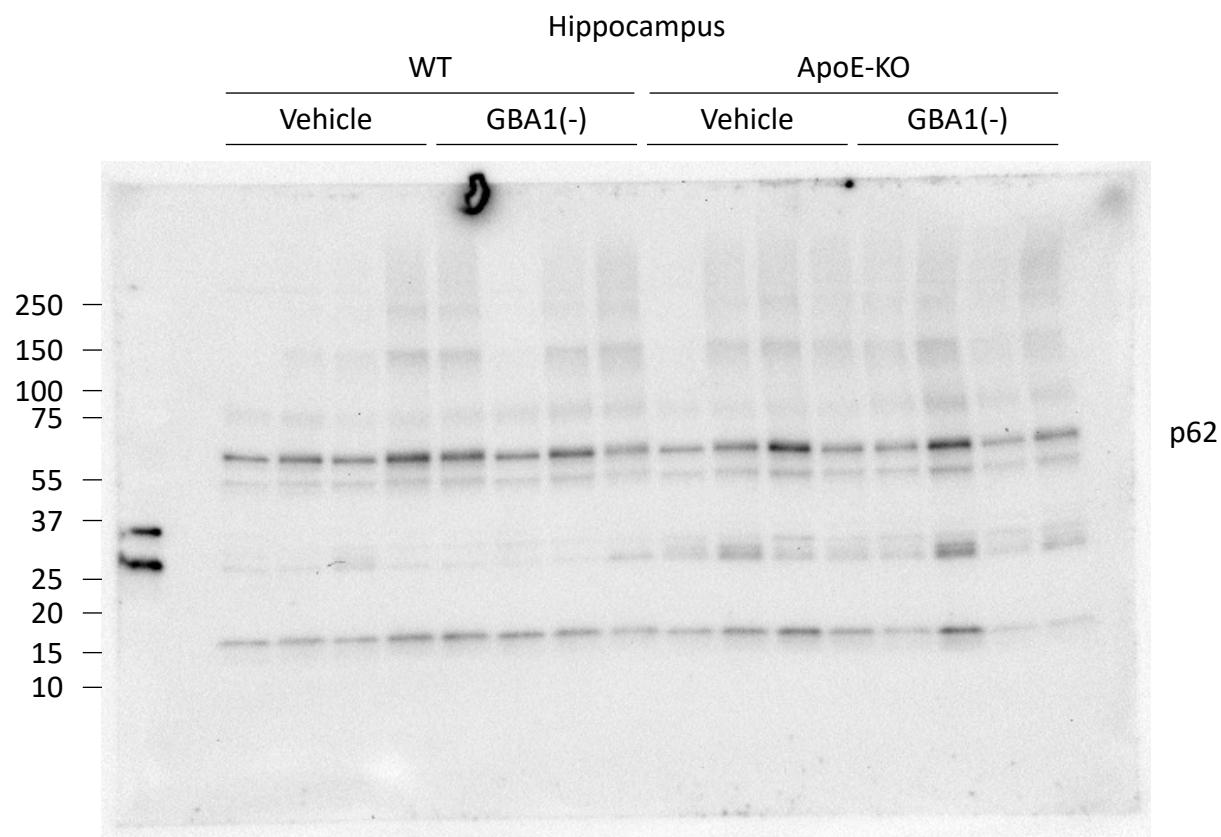

**Figure S5. p62 protein levels were unchanged after GBA1 inhibition.** Uncropped image of the p62 Western blot used to create the representative gel image in figure 5A.

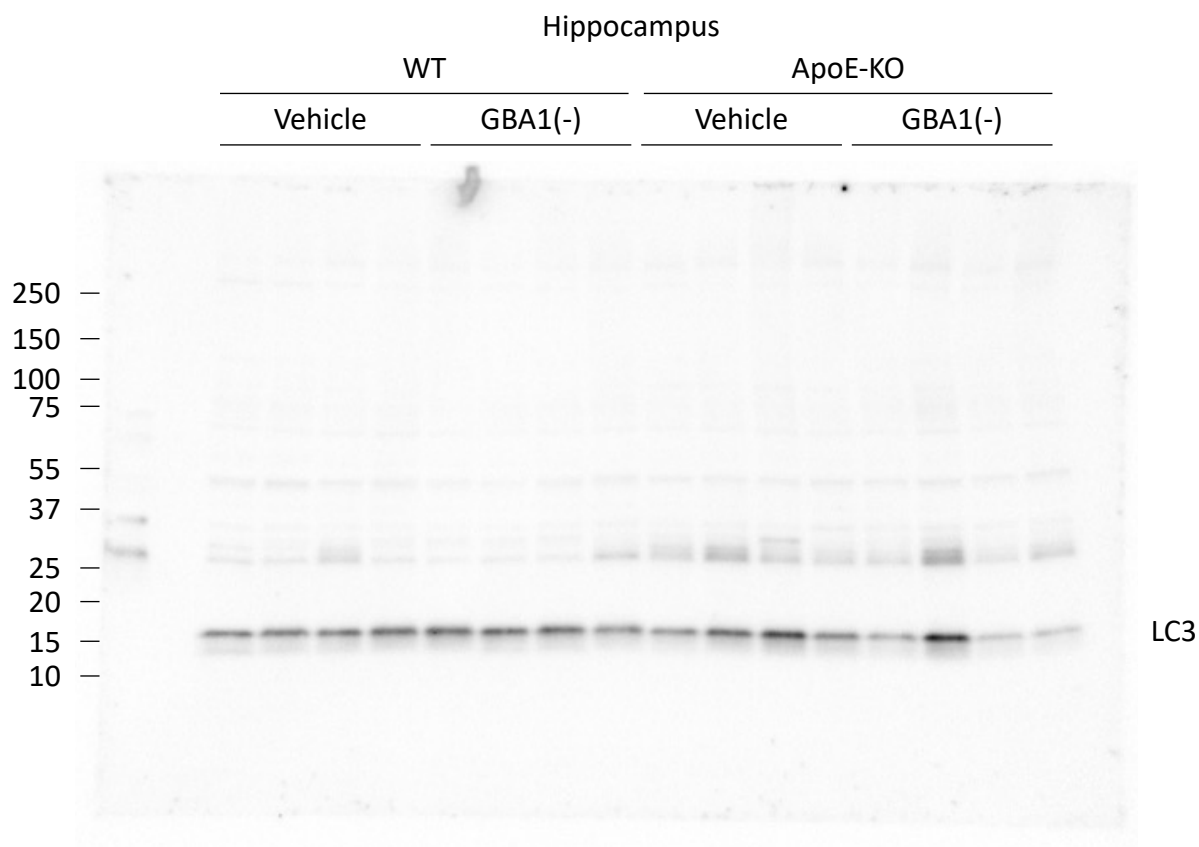

**Figure S6. LC3 protein levels were unchanged after GBA1 inhibition.** Uncropped image of the LC3 Western blot used to create the representative gel image in figure 5A.

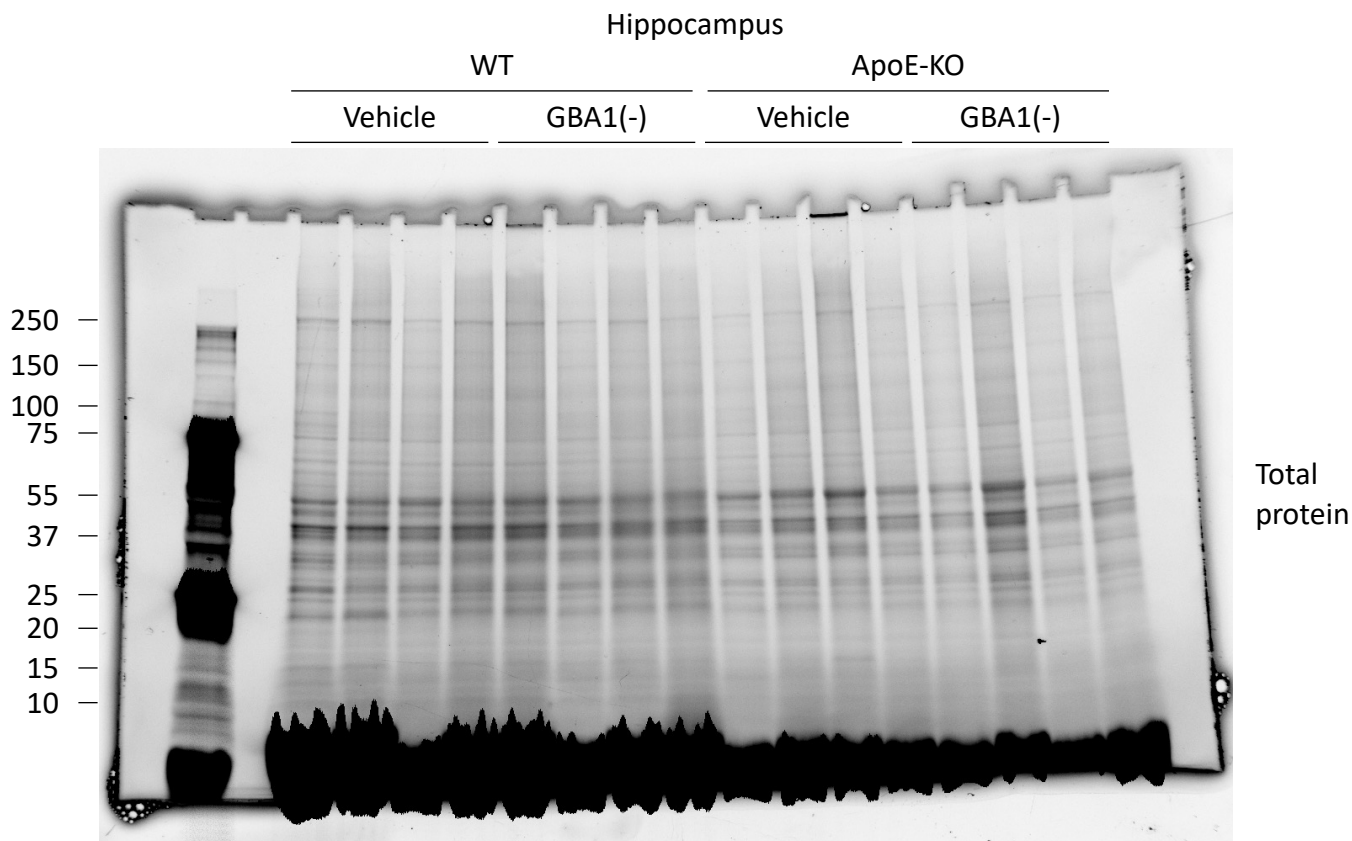

**Figure S7. Total protein loading levels.** Uncropped image of the protein gel showing total protein loading used to create the representative gel image in figure 5A.

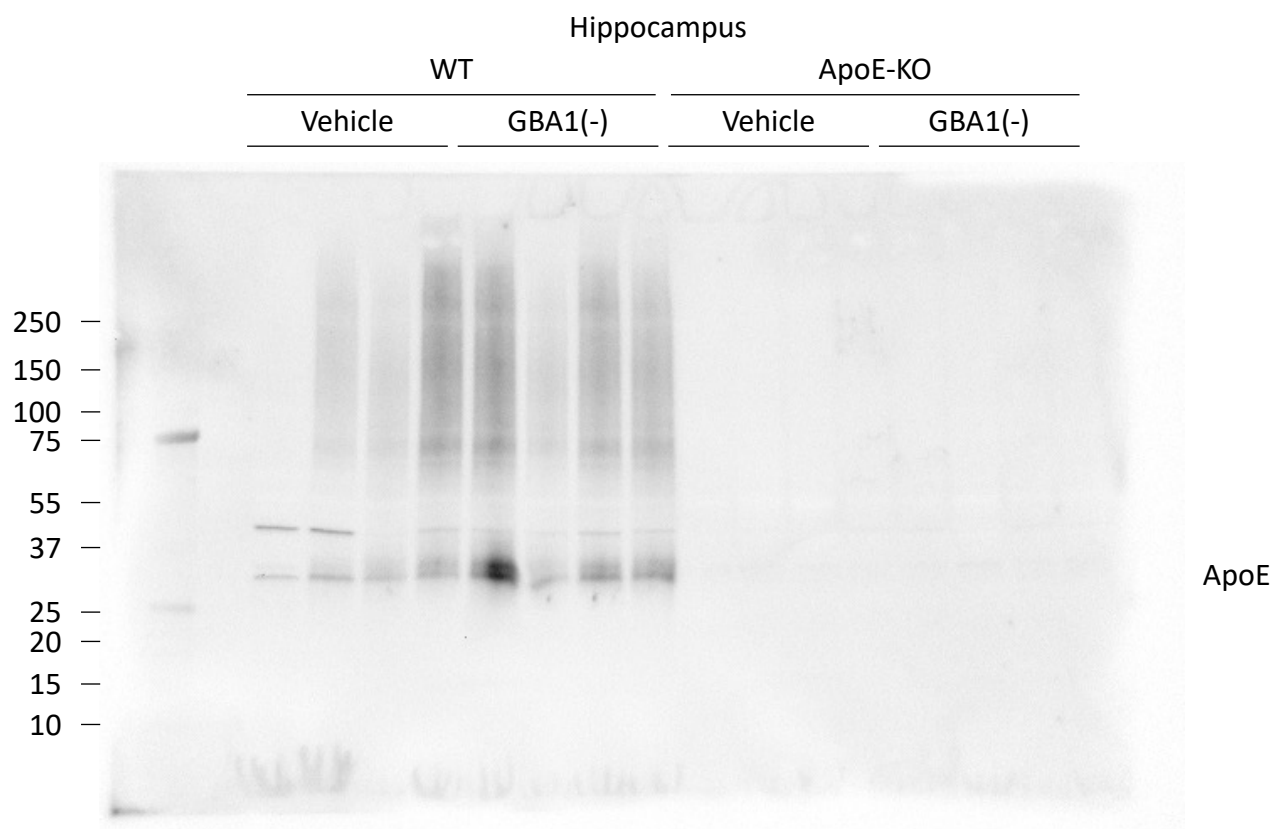

**Figure S8. ApoE protein levels were increased after GBA1 inhibition.** Uncropped image of the ApoE Western blot used to create the representative gel image in figure 5E.

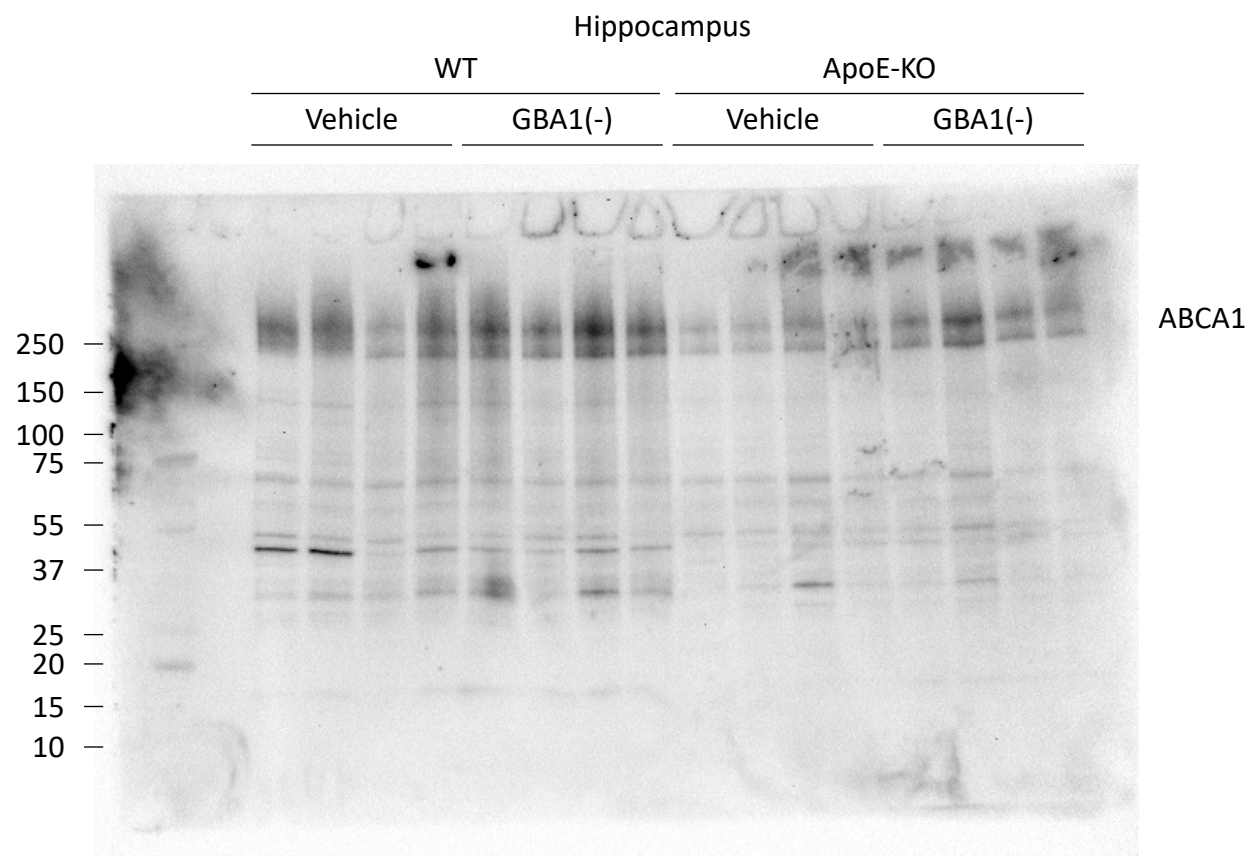

**Figure S9. ABCA1 protein levels were reduced in the absence of ApoE.** Uncropped image of the ABCA1 Western blot used to create the representative gel image in figure 5E.

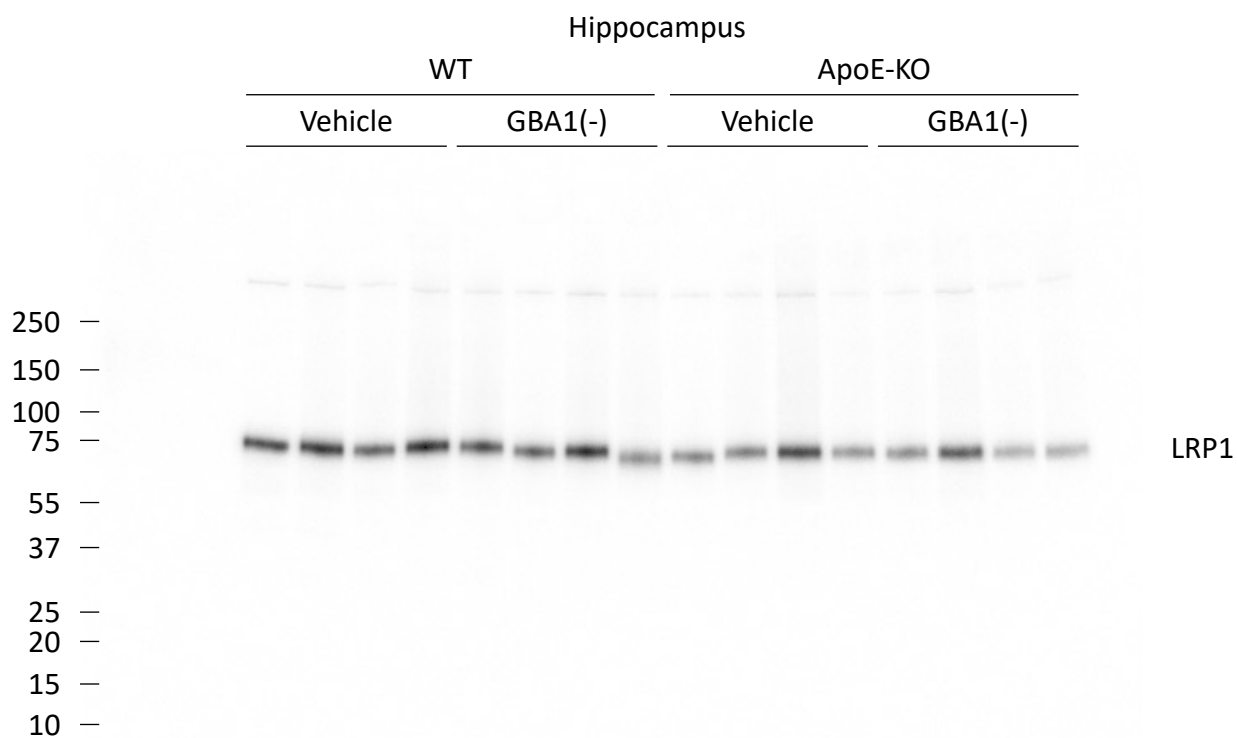

**Figure S10. LRP1 protein levels were reduced in the absence of ApoE.** Uncropped image of the LRP1 Western blot used to create the representative gel image in figure 5E.

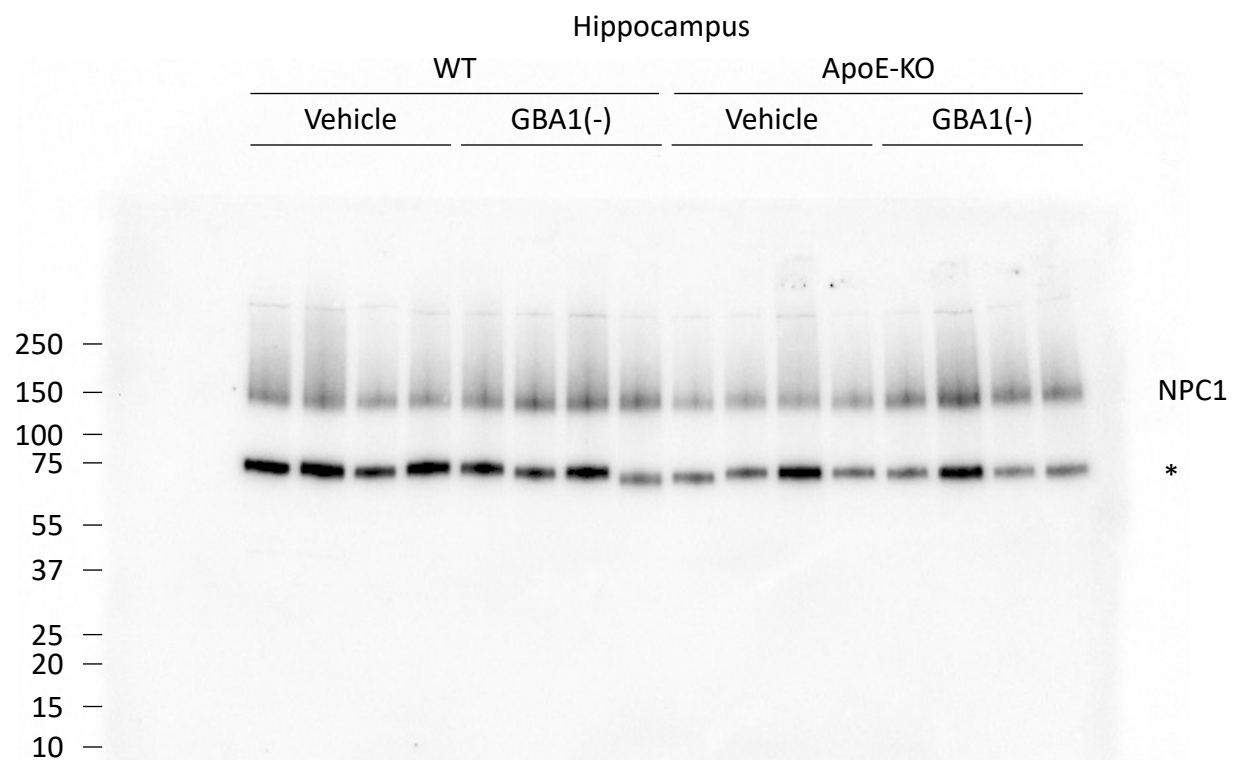

**Figure S11. NPC1 protein levels increased after GBA1 inhibition.** Uncropped image of the NPC1 Western blot used to create the representative gel image in figure 5E. Asterisks annotate bands not specific to NPC1.



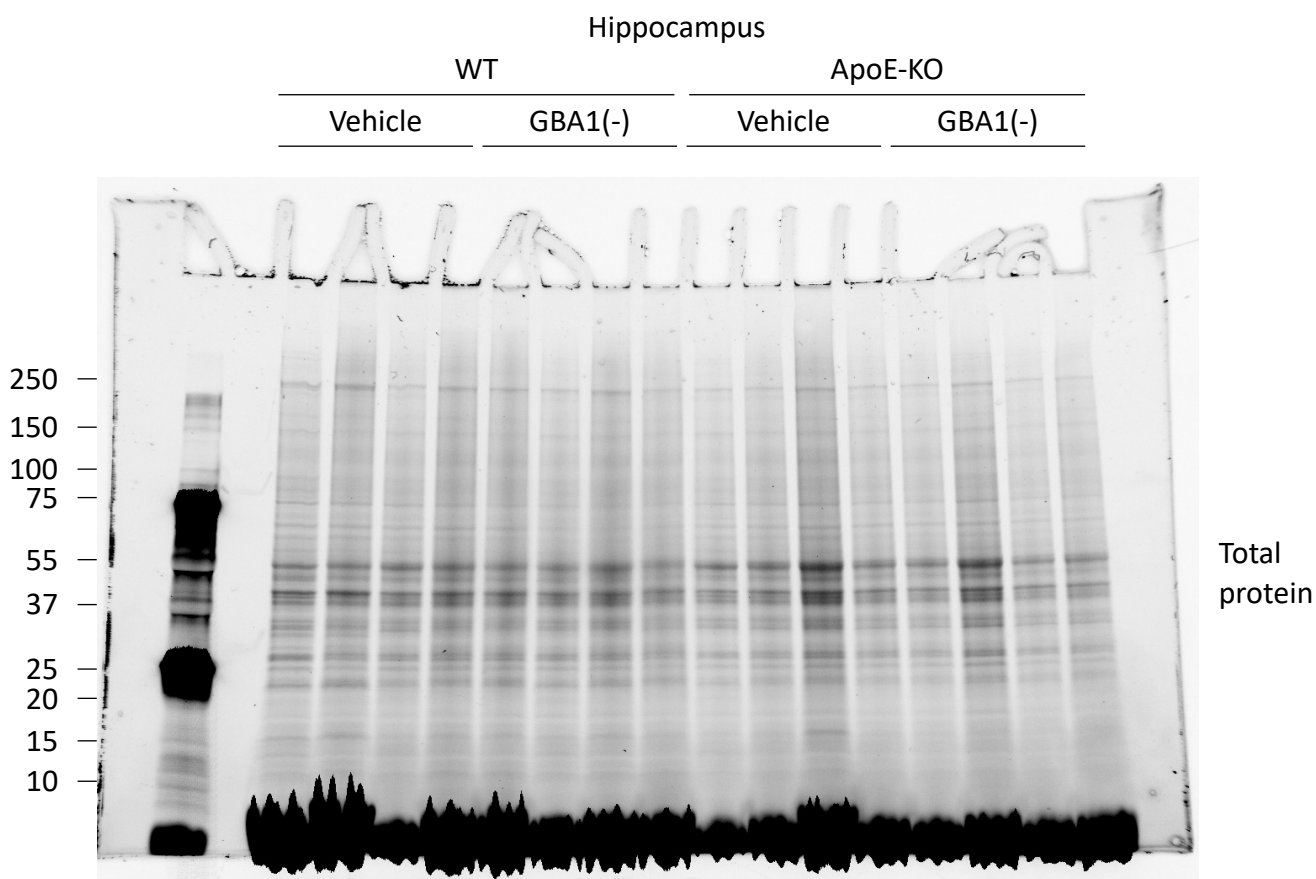

**Figure S12. Total protein loading levels.** Uncropped image of the protein gel showing total protein loading used to create the representative gel image in figure 5E.



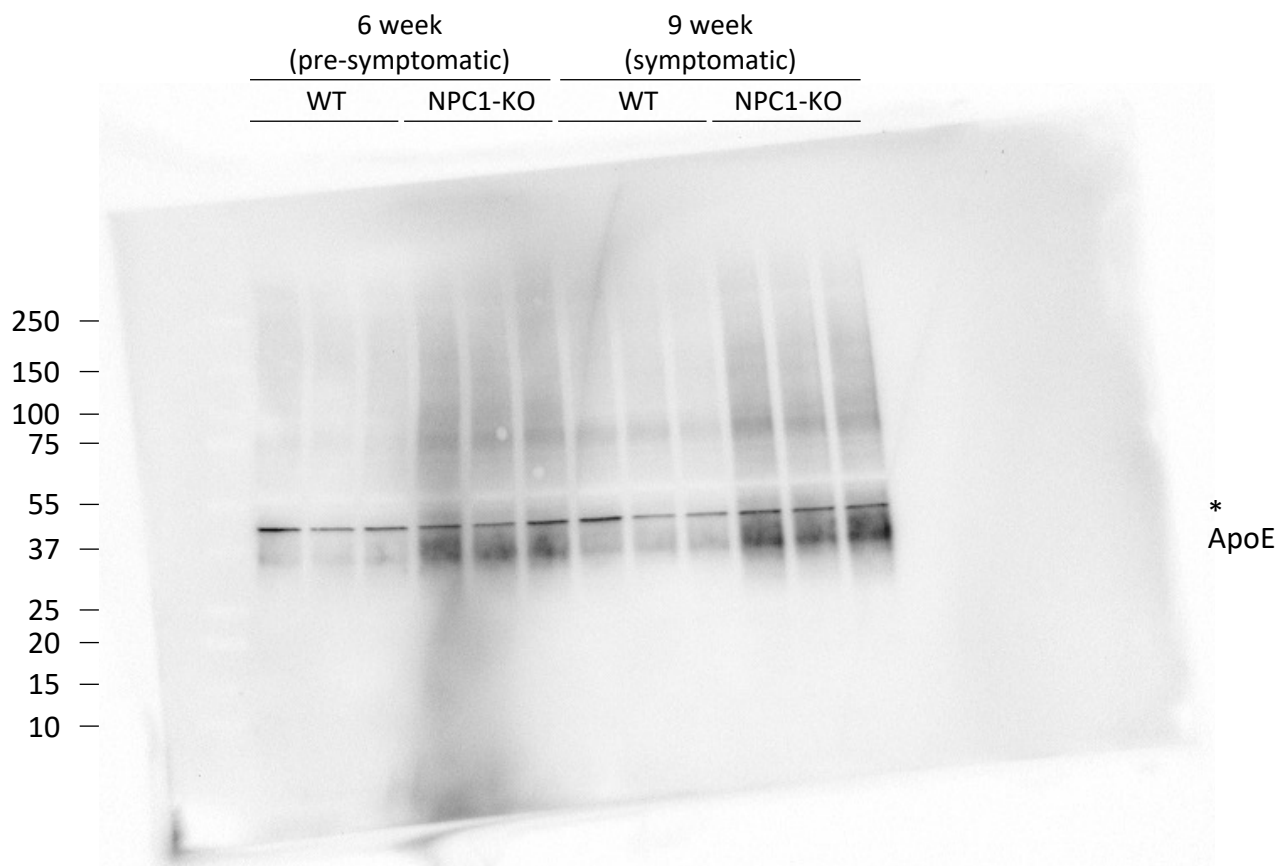

**Figure S13. ApoE protein levels were elevated in mouse brains in the absence of NPC1.** Uncropped image of the ApoE Western blot used to create the representative gel image in figure 6A. Asterisks annotate bands not specific to ApoE.

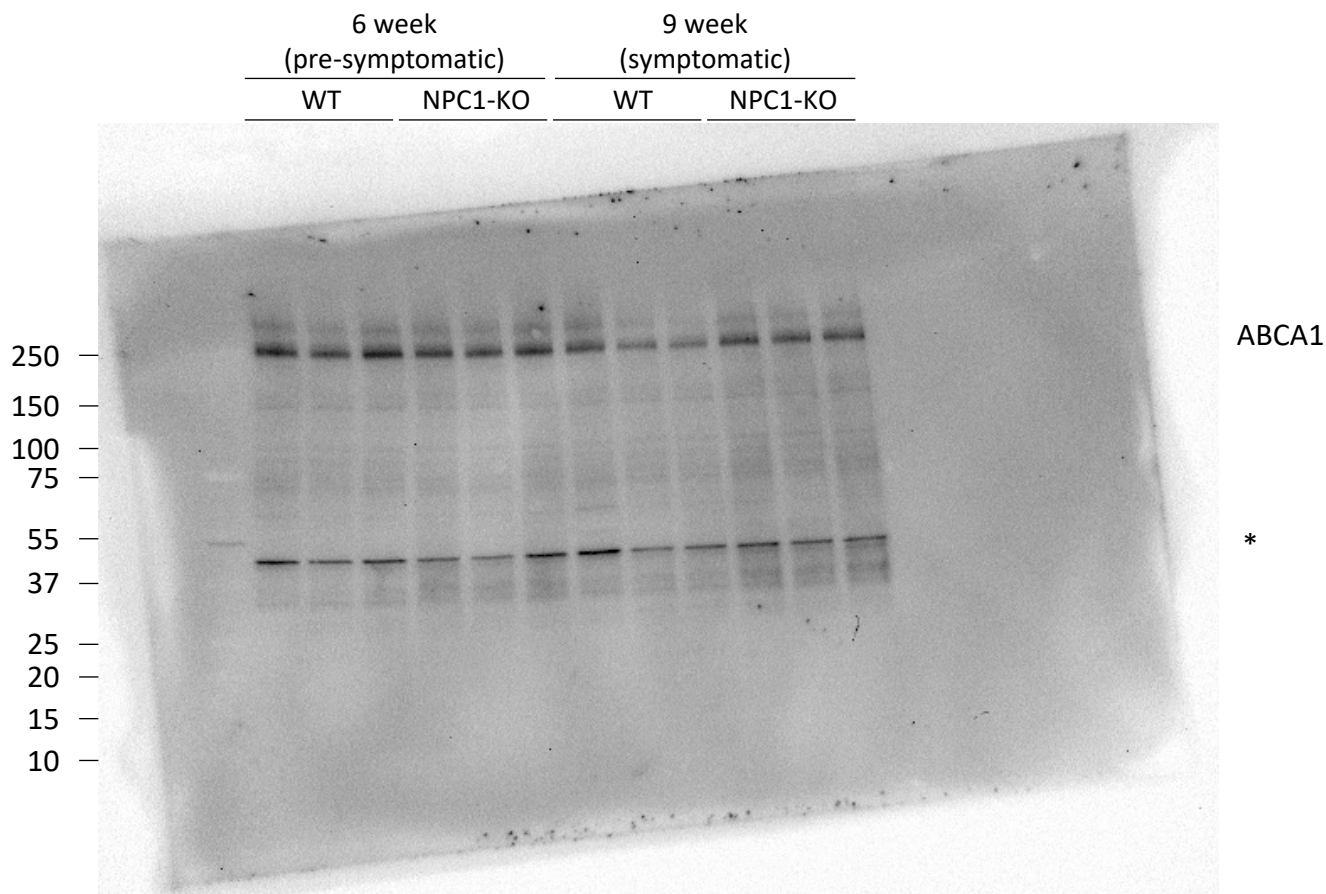

**Figure S14. ABCA1 protein levels were unchanged in mouse brains in the absence of NPC1.** Uncropped image of the ApoE Western blot used to create the representative gel image in figure 6A. Asterisks annotate bands not specific to ABCA1.

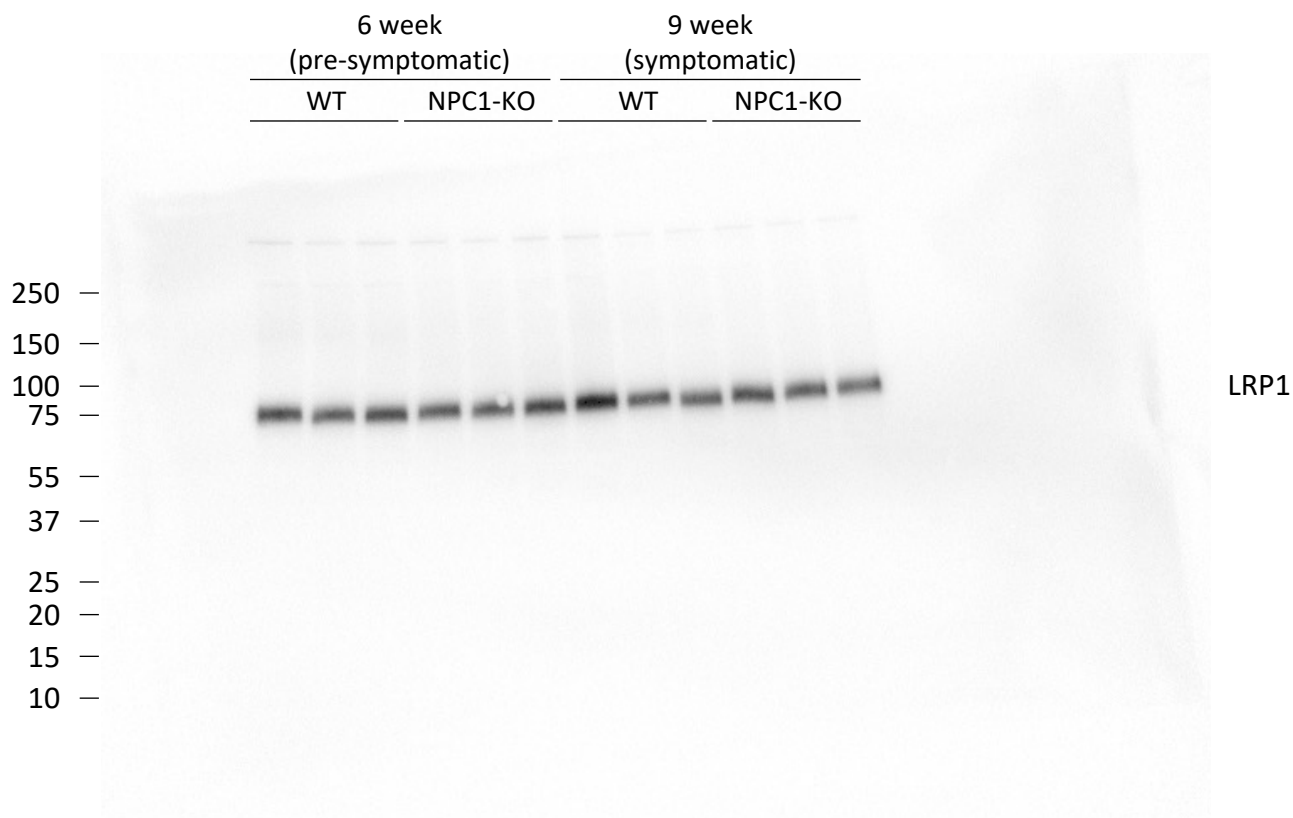

**Figure S15. LRP1 protein levels were unchanged in mouse brains in the absence of NPC1.** Uncropped image of the LRP1 Western blot used to create the representative gel image in figure 6A.

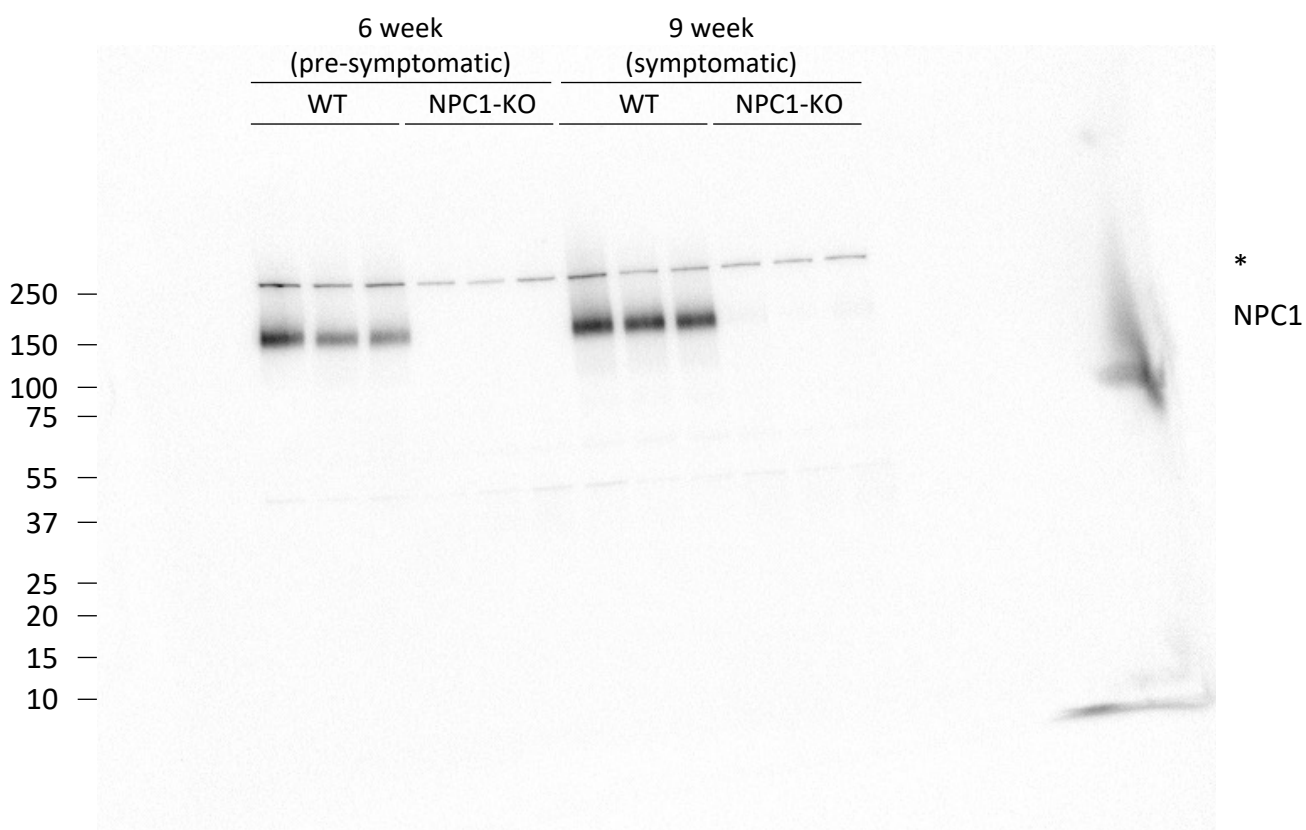

**Figure S16. NPC1 protein was absent from NPC1 knockout mouse brains.** Uncropped image of the NPC1 Western blot used to create the representative gel image in figure 6A. Asterisks annotate bands not specific to NPC1.

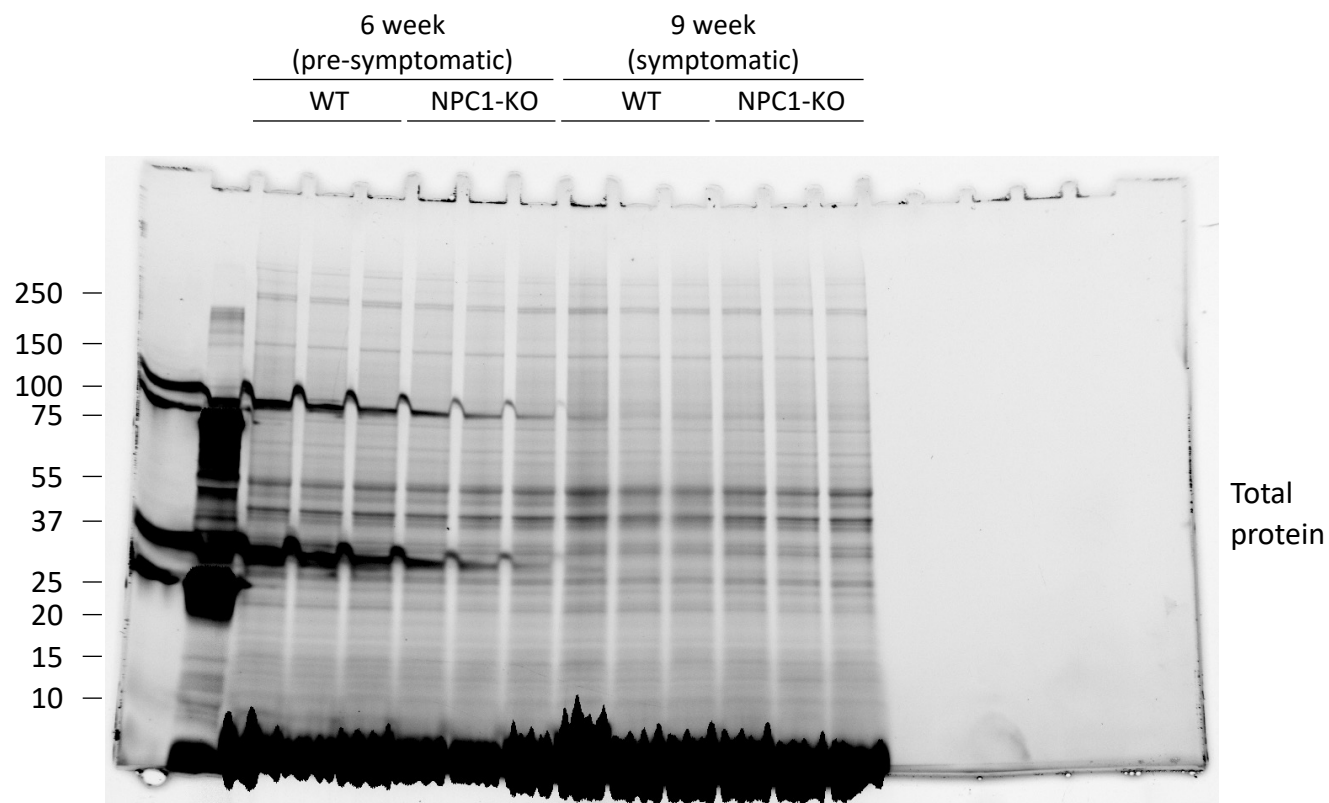

**Figure S17. Total protein loading levels.** Uncropped image of the protein gel showing total protein loading used to create the representative gel image in figure 6A.

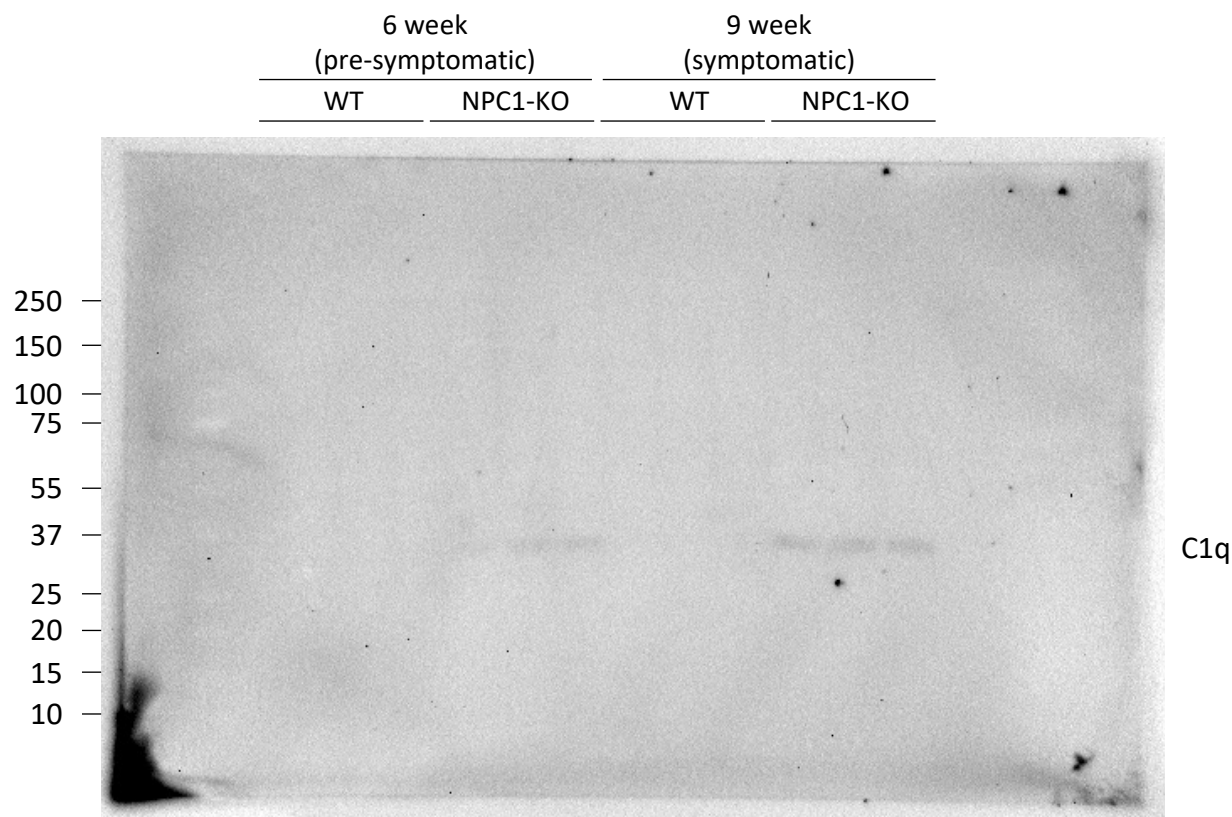

**Figure S18. C1q protein levels were increased in mouse brains in the absence of NPC1.** Uncropped image of the C1q Western blot used to create the representative gel image in figure 6F.

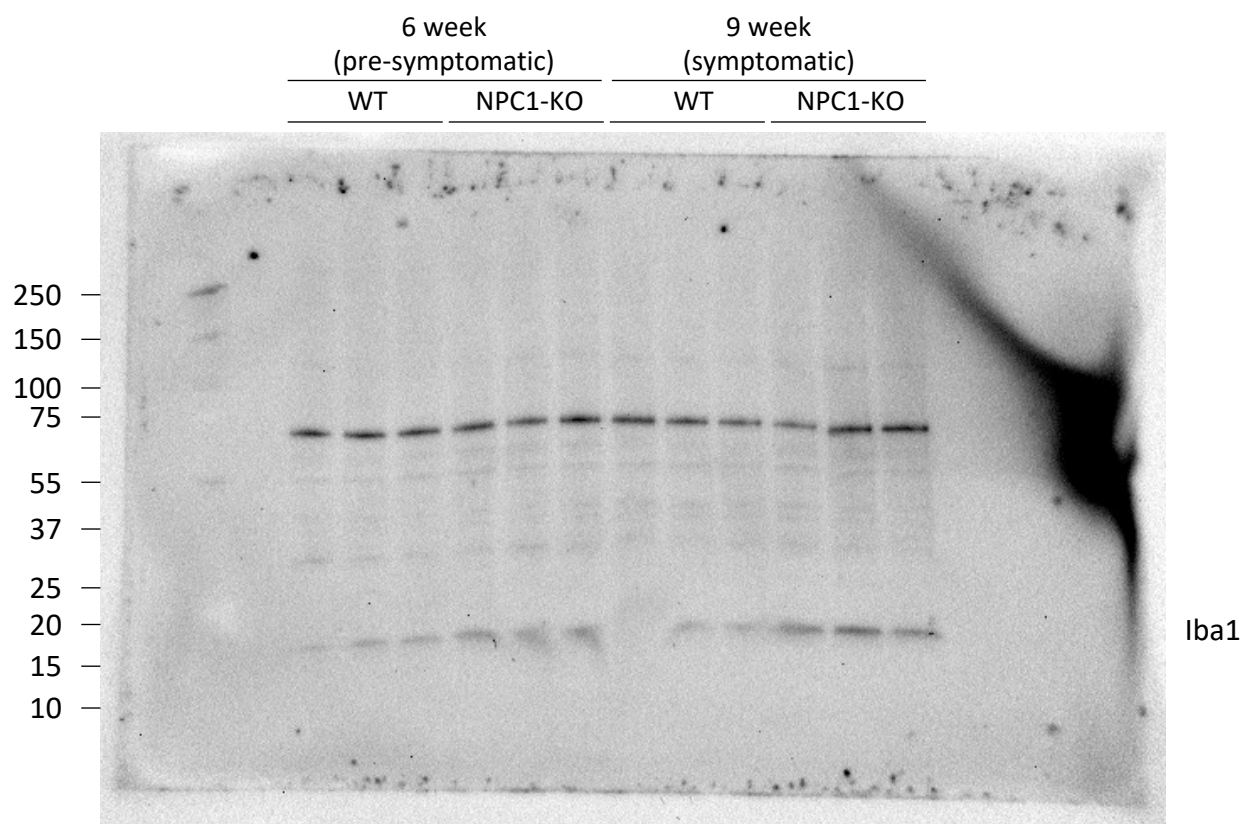

**Figure S19. Iba1 protein levels were increased in mouse brains in the absence of NPC1.** Uncropped image of the Iba1 Western blot used to create the representative gel image in figure 6F.

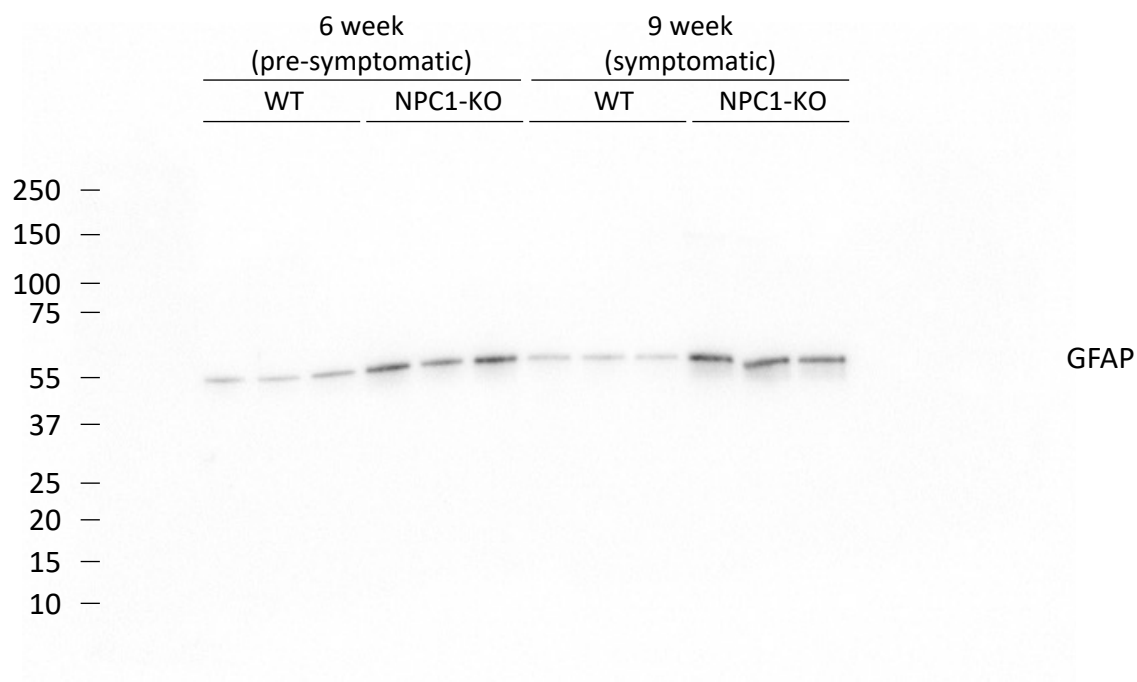

**Figure S20. GFAP protein levels were increased in mouse brains in the absence of NPC1.** Uncropped image of the GFAP Western blot used to create the representative gel image in figure 6F.

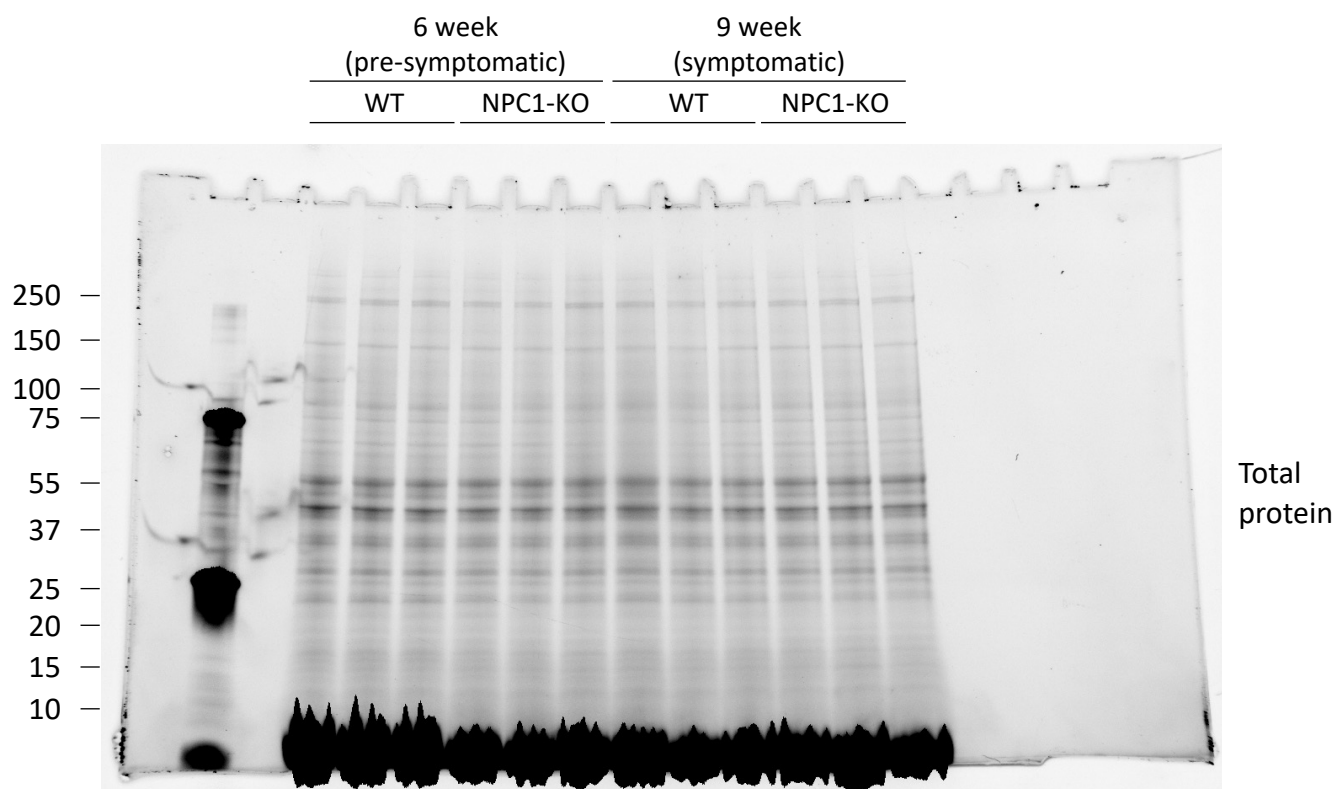

**Figure S21. Total protein loading levels.** Uncropped image of the protein gel showing total protein loading used to create the representative gel image in figure 6F.
